# Supplementary material
Source: publisher figshare collection journal article supplement (https://gsajournals.figshare.com/ndownloader/files/24829292)
Supplement: Supplementary file 1 [file 24829292]

## Sheet: SuppFile2
Table S8. Genes nearby the significant SNPs corresponded to at least one of the 17 key words through the annotations of genes.
No	SNP ID	Gene	Key word	Annotation
1	DSC01H1	Potri.001G189800	gibberellin	transcription factor MYBS3 isoform X1 nucleus;DNA binding;response to salt stress;response to ethylene;response to auxin;response to gibberellin;response to jasmonic acid;response to cadmium ion
1	DSC01H1	Potri.001G186100	auxin	auxin-responsive protein IAA27 nucleus;regulation of transcription, DNA-templated;auxin-activated signaling pathway
1	DSC01H1	Potri.001G189800	auxin	transcription factor MYBS3 isoform X1 nucleus;DNA binding;response to salt stress;response to ethylene;response to auxin;response to gibberellin;response to jasmonic acid;response to cadmium ion
1	DSC01H1	Potri.001G190300	auxin	auxin-responsive protein IAA26-like nucleus;regulation of transcription, DNA-templated;auxin-activated signaling pathway
1	DSC01H1	Potri.001G189900	cytokinin	histidine-containing phosphotransfer protein 4 nucleus;cytoplasm;histidine phosphotransfer kinase activity;2-alkenal reductase [NAD(P)+] activity;protein histidine kinase binding;phosphorelay signal transduction system;protein phosphorylation;cytokinin-activated signaling pathway;oxidation-reduction process
1	DSC01H1	Potri.001G191900	cytokinin	pseudo histidine-containing phosphotransfer protein 6 nucleus;cytoplasm;histidine phosphotransfer kinase activity;2-alkenal reductase [NAD(P)+] activity;protein histidine kinase binding;phosphorelay signal transduction system;protein phosphorylation;cytokinin-activated signaling pathway;oxidation-reduction process
1	DSC01H1	Potri.001G185900	photo	transcription factor bHLH68-like isoform X1 nucleus;chloroplast thylakoid membrane;DNA-binding transcription activator activity, RNA polymerase II-specific;DNA binding;oxidoreductase activity, acting on iron-sulfur proteins as donors;protein dimerization activity;photosynthetic electron transport in photosystem I;positive regulation of transcription by RNA polymerase II
1	DSC01H1	Potri.001G186800	photo	photosynthetic NDH subunit of subcomplex B 3, chloroplastic electron transfer activity;iron-sulfur cluster binding;electron transport chain
1	DSC01H1	Potri.001G188800	leaf	homeobox-leucine zipper protein ATHB-15 nucleus;lipid binding;transcription regulatory region DNA binding;leaf morphogenesis;meristem initiation;regulation of meristem growth;phloem or xylem histogenesis;determination of dorsal identity;integument development
1	DSC01H1	Potri.001G183600	embryo	Late embryogenesis abundant protein, LEA-14 integral component of membrane
1	DSC01H1	Potri.001G193500	embryo	embryo-specific protein ATS3B-like
1	DSC01H1	Potri.001G193300	root	protein root UVB sensitive 1, chloroplastic mitochondrion;chloroplast envelope;response to UV-B;developmental process
1	DSC01H1	Potri.001G188800	xylem	homeobox-leucine zipper protein ATHB-15 nucleus;lipid binding;transcription regulatory region DNA binding;leaf morphogenesis;meristem initiation;regulation of meristem growth;phloem or xylem histogenesis;determination of dorsal identity;integument development
1	DSC01H1	Potri.001G189800	salt	transcription factor MYBS3 isoform X1 nucleus;DNA binding;response to salt stress;response to ethylene;response to auxin;response to gibberellin;response to jasmonic acid;response to cadmium ion
1	DSC01H1	Potri.001G192600	salt	26.5 kDa heat shock protein, mitochondrial protein self-association;unfolded protein binding;response to reactive oxygen species;protein folding;response to heat;response to salt stress;protein complex oligomerization
1	DSC01H1	Potri.001G192600	heat	26.5 kDa heat shock protein, mitochondrial protein self-association;unfolded protein binding;response to reactive oxygen species;protein folding;response to heat;response to salt stress;protein complex oligomerization
1	DSC01H1	Potri.001G186700	water	aquaporin TIP2-1 integral component of membrane;water channel activity;water transport;transmembrane transport
2	DSC01H2	Potri.001G205200	auxin	auxin efflux carrier component 2 auxin polar transport;auxin homeostasis;transmembrane transport;auxin efflux transmembrane transporter activity;integral component of membrane;endoplasmic reticulum;auxin efflux;plasma membrane
2	DSC01H2	Potri.001G210000	photo	chlorophyll a-b binding protein CP24 10A, chloroplastic photosystem I;photosystem II;chloroplast thylakoid membrane;chloroplast envelope;plastoglobule;integral component of membrane;chlorophyll binding;response to light stimulus;photosynthesis, light harvesting in photosystem I;protein-chromophore linkage
2	DSC01H2	Potri.001G207100	cold	glycine-rich RNA-binding protein RZ1A nucleus;cytosol;ribonucleoprotein complex;nucleotide binding;mRNA binding;zinc ion binding;response to cold;regulation of RNA metabolic process
3	DSC01H3	Potri.001G405500	brassinosteroid	receptor-like protein kinase THESEUS 1 plasma membrane;plasmodesma;integral component of membrane;protein kinase activity;ATP binding;response to brassinosteroid;defense response to fungus, incompatible interaction;unidimensional cell growth;protein autophosphorylation
3	DSC01H3	Potri.001G403300	photo	protochlorophyllide reductase, chloroplastic chloroplast;protochlorophyllide reductase activity;photosynthesis;chlorophyll biosynthetic process;oxidation-reduction process
3	DSC01H3	Potri.001G407100	photo	chlorophyll a-b binding protein 13, chloroplastic photosystem I;photosystem II;chloroplast thylakoid membrane;chloroplast envelope;plastoglobule;integral component of membrane;chlorophyll binding;response to light stimulus;photosynthesis, light harvesting in photosystem I;protein-chromophore linkage
3	DSC01H3	Potri.001G405650	embryo	Late embryogenesis abundant protein-related DNA-directed 5'-3' RNA polymerase activity;RNA biosynthetic process
3	DSC01H3	Potri.001G403200	seed	lanC-like protein GCR2 plasma membrane;catalytic activity;abscisic acid binding;regulation of abscisic acid-activated signaling pathway;maintenance of seed dormancy
3	DSC01H3	Potri.001G403800	disease	disease resistance protein LAZ5 signal transduction
3	DSC01H3	Potri.001G404800	disease	probable disease resistance protein At4g27220 DNA binding;ADP binding
3	DSC01H3	Potri.001G404875	disease	probable disease resistance protein At4g27220 DNA binding;ADP binding
3	DSC01H3	Potri.001G405025	disease	probable disease resistance protein At4g27220 DNA binding;ADP binding
3	DSC01H3	Potri.001G405100	disease	probable disease resistance protein At4g27220 DNA binding;ADP binding
3	DSC01H3	Potri.001G405900	disease	probable disease resistance protein At4g27220
3	DSC01H3	Potri.001G406000	disease	probable disease resistance protein At4g27220 ADP binding
3	DSC01H3	Potri.001G410477	disease	disease resistance RPP13-like protein 4 protein serine/threonine kinase activity;ADP binding;protein phosphorylation
4	DSC01H4	Potri.001G455400	gibberellin	2-oxoglutarate-dependent dioxygenase DAO-like gibberellin 3-beta-dioxygenase activity;metal ion binding;indole-3-acetaldehyde oxidase activity;auxin catabolic process;auxin homeostasis;oxidation-reduction process
4	DSC01H4	Potri.001G453600	auxin	actin-7 cell wall;nucleolus;mitochondrion;cytosol;cytoskeleton;plasma membrane;plasmodesma;chloroplast stroma;chloroplast envelope;structural constituent of cytoskeleton;ATP binding;cytoskeleton organization;response to light stimulus;response to wounding;response to auxin;seed germination;root hair elongation;cell division
4	DSC01H4	Potri.001G455400	auxin	2-oxoglutarate-dependent dioxygenase DAO-like gibberellin 3-beta-dioxygenase activity;metal ion binding;indole-3-acetaldehyde oxidase activity;auxin catabolic process;auxin homeostasis;oxidation-reduction process
4	DSC01H4	Potri.001G453600	seed	actin-7 cell wall;nucleolus;mitochondrion;cytosol;cytoskeleton;plasma membrane;plasmodesma;chloroplast stroma;chloroplast envelope;structural constituent of cytoskeleton;ATP binding;cytoskeleton organization;response to light stimulus;response to wounding;response to auxin;seed germination;root hair elongation;cell division
4	DSC01H4	Potri.001G453600	root	actin-7 cell wall;nucleolus;mitochondrion;cytosol;cytoskeleton;plasma membrane;plasmodesma;chloroplast stroma;chloroplast envelope;structural constituent of cytoskeleton;ATP binding;cytoskeleton organization;response to light stimulus;response to wounding;response to auxin;seed germination;root hair elongation;cell division
4	DSC01H4	Potri.001G443966	disease	probable disease resistance protein At4g27220 ADP binding
4	DSC01H4	Potri.001G444000	disease	probable disease resistance protein At4g27220 isoform X1 ADP binding
4	DSC01H4	Potri.001G444050	disease	probable disease resistance protein At4g27220 ADP binding
4	DSC01H4	Potri.001G444100	disease	probable disease resistance protein At4g27220 ADP binding
4	DSC01H4	Potri.001G444350	disease	probable disease resistance protein At4g27220 isoform X1 ADP binding
4	DSC01H4	Potri.001G444500	disease	probable disease resistance protein At4g27220 ADP binding
4	DSC01H4	Potri.001G444600	disease	putative disease resistance protein ADP binding
4	DSC01H4	Potri.001G444875	disease	probable disease resistance protein At1g12290
4	DSC01H4	Potri.001G445150	disease	probable disease resistance protein At4g27220 ADP binding
4	DSC01H4	Potri.001G445700	disease	probable disease resistance protein At4g27220 ADP binding
4	DSC01H4	Potri.001G446016	disease	probable disease resistance protein At4g27220 isoform X1 ADP binding
4	DSC01H4	Potri.001G446332	disease	probable disease resistance protein At4g27220 ADP binding
4	DSC01H4	Potri.001G446650	disease	probable disease resistance protein At4g27220 isoform X1 ADP binding
4	DSC01H4	Potri.001G446966	disease	putative disease resistance protein ADP binding
4	DSC01H4	Potri.001G447132	disease	probable disease resistance protein At4g27220 ADP binding
5	DSC03H1	Potri.003G026600	brassinosteroid	BES1/BZR1 homolog protein 4 isoform X2 DNA-binding transcription factor activity;regulation of transcription, DNA-templated;brassinosteroid mediated signaling pathway
5	DSC03H1	Potri.003G020400	photo	chlorophyll a-b binding protein CP24 10A, chloroplastic photosystem I;photosystem II;chloroplast thylakoid membrane;chloroplast envelope;plastoglobule;integral component of membrane;chlorophyll binding;response to light stimulus;photosynthesis, light harvesting in photosystem I;protein-chromophore linkage
5	DSC03H1	Potri.003G022800	shoot	NAC domain-containing protein 104-like nucleus;DNA binding;regulation of transcription, DNA-templated;xylem development;regulation of programmed cell death;shoot system development
5	DSC03H1	Potri.003G022800	xylem	NAC domain-containing protein 104-like nucleus;DNA binding;regulation of transcription, DNA-templated;xylem development;regulation of programmed cell death;shoot system development
5	DSC03H1	Potri.003G025904	disease	putative disease resistance protein RGA3 ADP binding
5	DSC03H1	Potri.003G031800	heat	Molecular chaperone Hsp40/DnaJ family protein isoform 1 chloroplast thylakoid membrane;chloroplast envelope;ATP binding;heat shock protein binding;metal ion binding;unfolded protein binding;response to heat;protein refolding;chaperone cofactor-dependent protein refolding
6	DSC03H2	Potri.003G207200	photo	transcription factor bHLH122-like isoform X1 nucleus;DNA-binding transcription activator activity, RNA polymerase II-specific;transcription regulatory region DNA binding;protein dimerization activity;regulation of stomatal movement;cuticle development;positive regulation of transcription by RNA polymerase II;photoperiodism, flowering
6	DSC03H2	Potri.003G215700	photo	casein kinase 1-like protein HD16 nucleus;cytoplasm;protein serine/threonine kinase activity;ATP binding;Wnt signaling pathway;peptidyl-serine phosphorylation;long-day photoperiodism, flowering;histone H2A phosphorylation
6	DSC03H2	Potri.003G204900	embryo	outer envelope protein 80, chloroplastic isoform X1 SAM complex;chloroplast envelope;integral component of membrane;chloroplast organization;embryo development ending in seed dormancy;cellular protein-containing complex assembly;protein insertion into mitochondrial outer membrane
6	DSC03H2	Potri.003G207200	flower	transcription factor bHLH122-like isoform X1 nucleus;DNA-binding transcription activator activity, RNA polymerase II-specific;transcription regulatory region DNA binding;protein dimerization activity;regulation of stomatal movement;cuticle development;positive regulation of transcription by RNA polymerase II;photoperiodism, flowering
6	DSC03H2	Potri.003G215700	flower	casein kinase 1-like protein HD16 nucleus;cytoplasm;protein serine/threonine kinase activity;ATP binding;Wnt signaling pathway;peptidyl-serine phosphorylation;long-day photoperiodism, flowering;histone H2A phosphorylation
6	DSC03H2	Potri.003G204900	seed	outer envelope protein 80, chloroplastic isoform X1 SAM complex;chloroplast envelope;integral component of membrane;chloroplast organization;embryo development ending in seed dormancy;cellular protein-containing complex assembly;protein insertion into mitochondrial outer membrane
6	DSC03H2	Potri.003G211100	salt	beta-glucosidase 12-like beta-glucosidase activity;carbohydrate metabolic process;response to salt stress;glucosinolate catabolic process
7	DSC04H1	Potri.004G059000	brassinosteroid	shaggy-related protein kinase eta identical protein binding;positive regulation of protein export from nucleus;protein autophosphorylation;root hair cell differentiation;protein serine/threonine kinase activity;negative regulation of brassinosteroid mediated signaling pathway;plasma membrane;leaf morphogenesis;response to auxin;tau-protein kinase activity;detection of brassinosteroid stimulus;nuc…
7	DSC04H1	Potri.004G050150	auxin	auxin response factor 3-like nucleus;DNA binding;regulation of transcription, DNA-templated;auxin-activated signaling pathway
7	DSC04H1	Potri.004G058500	auxin	calmodulin-binding receptor kinase CaMRLK integral component of membrane;protein kinase activity;calmodulin binding;ATP binding;response to osmotic stress;response to insect;response to auxin;embryo development ending in seed dormancy;protein autophosphorylation
7	DSC04H1	Potri.004G059000	auxin	shaggy-related protein kinase eta identical protein binding;positive regulation of protein export from nucleus;protein autophosphorylation;root hair cell differentiation;protein serine/threonine kinase activity;negative regulation of brassinosteroid mediated signaling pathway;plasma membrane;leaf morphogenesis;response to auxin;tau-protein kinase activity;detection of brassinosteroid stimulus;nuc…
7	DSC04H1	Potri.004G050900	photo	transcription factor VOZ1 isoform X1 nucleus;defense response to bacterium, incompatible interaction;response to heat;response to salt stress;positive regulation of transcription, DNA-templated;cold acclimation;sequence-specific DNA binding;positive regulation of long-day photoperiodism, flowering;response to water deprivation
7	DSC04H1	Potri.004G053400	photo	magnesium-chelatase subunit ChlI, chloroplastic chloroplast stroma;ATP binding;hydrolase activity;magnesium chelatase activity;photosynthesis;chlorophyll biosynthetic process
7	DSC04H1	Potri.004G059000	leaf	shaggy-related protein kinase eta identical protein binding;positive regulation of protein export from nucleus;protein autophosphorylation;root hair cell differentiation;protein serine/threonine kinase activity;negative regulation of brassinosteroid mediated signaling pathway;plasma membrane;leaf morphogenesis;response to auxin;tau-protein kinase activity;detection of brassinosteroid stimulus;nuc…
7	DSC04H1	Potri.004G058500	embryo	calmodulin-binding receptor kinase CaMRLK integral component of membrane;protein kinase activity;calmodulin binding;ATP binding;response to osmotic stress;response to insect;response to auxin;embryo development ending in seed dormancy;protein autophosphorylation
7	DSC04H1	Potri.004G050900	flower	transcription factor VOZ1 isoform X1 nucleus;defense response to bacterium, incompatible interaction;response to heat;response to salt stress;positive regulation of transcription, DNA-templated;cold acclimation;sequence-specific DNA binding;positive regulation of long-day photoperiodism, flowering;response to water deprivation
7	DSC04H1	Potri.004G058500	seed	calmodulin-binding receptor kinase CaMRLK integral component of membrane;protein kinase activity;calmodulin binding;ATP binding;response to osmotic stress;response to insect;response to auxin;embryo development ending in seed dormancy;protein autophosphorylation
7	DSC04H1	Potri.004G059000	root	shaggy-related protein kinase eta identical protein binding;positive regulation of protein export from nucleus;protein autophosphorylation;root hair cell differentiation;protein serine/threonine kinase activity;negative regulation of brassinosteroid mediated signaling pathway;plasma membrane;leaf morphogenesis;response to auxin;tau-protein kinase activity;detection of brassinosteroid stimulus;nuc…
7	DSC04H1	Potri.004G056374	disease	putative disease resistance protein RGA3
7	DSC04H1	Potri.004G050900	salt	transcription factor VOZ1 isoform X1 nucleus;defense response to bacterium, incompatible interaction;response to heat;response to salt stress;positive regulation of transcription, DNA-templated;cold acclimation;sequence-specific DNA binding;positive regulation of long-day photoperiodism, flowering;response to water deprivation
7	DSC04H1	Potri.004G050900	heat	transcription factor VOZ1 isoform X1 nucleus;defense response to bacterium, incompatible interaction;response to heat;response to salt stress;positive regulation of transcription, DNA-templated;cold acclimation;sequence-specific DNA binding;positive regulation of long-day photoperiodism, flowering;response to water deprivation
7	DSC04H1	Potri.004G051100	heat	28 kDa heat- and acid-stable phosphoprotein nucleus;cytosol
7	DSC04H1	Potri.004G050900	cold	transcription factor VOZ1 isoform X1 nucleus;defense response to bacterium, incompatible interaction;response to heat;response to salt stress;positive regulation of transcription, DNA-templated;cold acclimation;sequence-specific DNA binding;positive regulation of long-day photoperiodism, flowering;response to water deprivation
7	DSC04H1	Potri.004G050900	water	transcription factor VOZ1 isoform X1 nucleus;defense response to bacterium, incompatible interaction;response to heat;response to salt stress;positive regulation of transcription, DNA-templated;cold acclimation;sequence-specific DNA binding;positive regulation of long-day photoperiodism, flowering;response to water deprivation
8	DSC04H2	Potri.004G195800	photo	geranylgeranyl diphosphate reductase, chloroplastic chloroplast thylakoid membrane;oxidoreductase activity, acting on the CH-CH group of donors, NAD or NADP as acceptor;geranylgeranyl reductase activity;FAD binding;photosynthesis;chlorophyll biosynthetic process;oxidation-reduction process
8	DSC04H2	Potri.004G199400	photo	photosystem I subunit O integral component of membrane
8	DSC04H2	Potri.004G196400	shoot	serrate RNA effector molecule nucleic acid binding;nuclear cap binding complex;regulation of meristem development;primary miRNA processing;shoot system development;regulation of alternative mRNA splicing, via spliceosome;nuclear speck;cytosol;nuclear dicing body;regulation of adaxial/abaxial pattern formation;nucleolus;production of ta-siRNAs involved in RNA interference
8	DSC04H2	Potri.004G197200	embryo	rRNA-processing protein UTP23 homolog nucleolus;small-subunit processome;small ribosomal subunit rRNA binding;embryo development ending in seed dormancy
8	DSC04H2	Potri.004G188800	seed	histone deacetylase HDT1 nucleolus;nucleic acid binding;seed dormancy process;negative regulation of transcription, DNA-templated
8	DSC04H2	Potri.004G197200	seed	rRNA-processing protein UTP23 homolog nucleolus;small-subunit processome;small ribosomal subunit rRNA binding;embryo development ending in seed dormancy
8	DSC04H2	Potri.004G194800	disease	putative disease resistance RPP13-like protein 1 ADP binding
8	DSC04H2	Potri.004G196100	disease	putative disease resistance RPP13-like protein 1 ADP binding
8	DSC04H2	Potri.004G197800	disease	putative disease resistance protein RGA3 ADP binding
8	DSC04H2	Potri.004G197900	disease	putative disease resistance protein RGA3 ADP binding
8	DSC04H2	Potri.004G187400	salt	18.1 kDa class I heat shock protein-like protein self-association;unfolded protein binding;response to reactive oxygen species;protein folding;response to heat;response to salt stress;protein complex oligomerization
8	DSC04H2	Potri.004G187450	salt	18.1 kDa class I heat shock protein protein self-association;unfolded protein binding;response to reactive oxygen species;protein folding;response to heat;response to salt stress;protein complex oligomerization
8	DSC04H2	Potri.004G187400	heat	18.1 kDa class I heat shock protein-like protein self-association;unfolded protein binding;response to reactive oxygen species;protein folding;response to heat;response to salt stress;protein complex oligomerization
8	DSC04H2	Potri.004G187450	heat	18.1 kDa class I heat shock protein protein self-association;unfolded protein binding;response to reactive oxygen species;protein folding;response to heat;response to salt stress;protein complex oligomerization
9	DSC04H3	Potri.004G204100	brassinosteroid	cytochrome P450 87A3-like integral component of membrane;monooxygenase activity;iron ion binding;oxidoreductase activity, acting on paired donors, with incorporation or reduction of molecular oxygen;heme binding;multicellular organism development;brassinosteroid homeostasis;sterol metabolic process;brassinosteroid biosynthetic process;oxidation-reduction process
9	DSC04H3	Potri.004G203900	flower	terminal flowering 1 protein 1 nucleus;cytoplasm;transcription coregulator activity;negative regulation of flower development;vegetative to reproductive phase transition of meristem;regulation of nucleic acid-templated transcription
9	DSC04H3	Potri.004G202500	root	ferredoxin, root R-B2 chloroplast;electron transfer activity;metal ion binding;2 iron, 2 sulfur cluster binding;electron transport chain
9	DSC04H3	Potri.004G202683	disease	putative disease resistance protein RGA3 ADP binding
10	DSC05H1	Potri.005G010700	photo	psbP domain-containing protein 1, chloroplastic photosystem II oxygen evolving complex;extrinsic component of membrane;calcium ion binding;photosynthesis
10	DSC05H1	Potri.005G001300	root	germin-like protein 5-1 cell wall;plasmodesma;apoplast;oxidoreductase activity;manganese ion binding;nutrient reservoir activity;plasmodesmata-mediated intercellular transport;oxidation-reduction process;regulation of root development
10	DSC05H1	Potri.005G007001	disease	putative disease resistance RPP13-like protein 1 ADP binding
10	DSC05H1	Potri.005G007750	disease	disease resistance protein RPM1-like ADP binding
10	DSC05H1	Potri.005G008666	disease	disease resistance protein RPM1-like ADP binding
10	DSC05H1	Potri.005G008732	disease	disease resistance protein RPM1-like phosphoprotein phosphatase activity;ADP binding;protein dephosphorylation
10	DSC05H1	Potri.005G009101	disease	disease resistance protein RPM1-like ADP binding
10	DSC05H1	Potri.005G009201	disease	disease resistance protein RPM1-like phosphoprotein phosphatase activity;ADP binding;protein dephosphorylation
10	DSC05H1	Potri.005G009450	disease	disease resistance protein RPM1-like ADP binding
10	DSC05H1	Potri.005G009900	disease	disease resistance protein RPM1-like phosphoprotein phosphatase activity;ADP binding;protein dephosphorylation
10	DSC05H1	Potri.005G011350	disease	probable disease resistance protein At5g63020
10	DSC05H1	Potri.005G000100	salt	DEAD-box ATP-dependent RNA helicase 3, chloroplastic nucleus;chloroplast stroma;chloroplast envelope;RNA helicase activity;mRNA binding;ATP binding;zinc ion binding;Group II intron splicing;response to salt stress;chloroplast organization;ribosome biogenesis
10	DSC05H1	Potri.005G000166	salt	DEAD-box ATP-dependent RNA helicase 3, chloroplastic isoform X2 nucleus;chloroplast stroma;chloroplast envelope;RNA helicase activity;mRNA binding;ATP binding;zinc ion binding;Group II intron splicing;response to salt stress;chloroplast organization;ribosome biogenesis
10	DSC05H1	Potri.005G000500	salt	DEAD-box ATP-dependent RNA helicase 3, chloroplastic nucleus;chloroplast stroma;chloroplast envelope;RNA helicase activity;mRNA binding;ATP binding;zinc ion binding;Group II intron splicing;response to salt stress;chloroplast organization;ribosome biogenesis
10	DSC05H1	Potri.005G002100	salt	hydrophobic protein LTI6B integral component of membrane;response to cold;response to salt stress;response to abscisic acid
10	DSC05H1	Potri.005G002100	cold	hydrophobic protein LTI6B integral component of membrane;response to cold;response to salt stress;response to abscisic acid
11	DSC05H2	Potri.005G159300	auxin	transport inhibitor response 1-like protein inositol hexakisphosphate binding;auxin-activated signaling pathway
11	DSC05H2	Potri.005G154836	photo	photosystem II protein D1 (chloroplast) photosystem II;chloroplast thylakoid membrane;integral component of membrane;iron ion binding;chlorophyll binding;oxidoreductase activity, acting on diphenols and related substances as donors, oxygen as acceptor;electron transporter, transferring electrons within the cyclic electron transport pathway of photosynthesis activity;response to herbicide;photosyn…
11	DSC05H2	Potri.005G156900	shoot	ubiquitin carboxyl-terminal hydrolase 17-like isoform X1 integral component of membrane;cysteine-type endopeptidase activity;thiol-dependent ubiquitin-specific protease activity;metal ion binding;ubiquitin-dependent protein catabolic process;protein deubiquitination;shoot system development
11	DSC05H2	Potri.005G157700	seed	14-3-3-like protein B protein domain specific binding;ATPase binding;seed trichome elongation
11	DSC05H2	Potri.005G162300	salt	VQ motif-containing protein 9 negative regulation of response to salt stress
11	DSC05H2	Potri.005G160200	heat	chaperone protein dnaJ 1, mitochondrial isoform X1 cytoplasm;ATP binding;heat shock protein binding;metal ion binding;unfolded protein binding;response to heat;protein refolding;chaperone cofactor-dependent protein refolding
12	DSC05H3	Potri.005G159300	auxin	transport inhibitor response 1-like protein inositol hexakisphosphate binding;auxin-activated signaling pathway
12	DSC05H3	Potri.005G154836	photo	photosystem II protein D1 (chloroplast) photosystem II;chloroplast thylakoid membrane;integral component of membrane;iron ion binding;chlorophyll binding;oxidoreductase activity, acting on diphenols and related substances as donors, oxygen as acceptor;electron transporter, transferring electrons within the cyclic electron transport pathway of photosynthesis activity;response to herbicide;photosyn…
12	DSC05H3	Potri.005G156900	shoot	ubiquitin carboxyl-terminal hydrolase 17-like isoform X1 integral component of membrane;cysteine-type endopeptidase activity;thiol-dependent ubiquitin-specific protease activity;metal ion binding;ubiquitin-dependent protein catabolic process;protein deubiquitination;shoot system development
12	DSC05H3	Potri.005G157700	seed	14-3-3-like protein B protein domain specific binding;ATPase binding;seed trichome elongation
12	DSC05H3	Potri.005G162300	salt	VQ motif-containing protein 9 negative regulation of response to salt stress
12	DSC05H3	Potri.005G160200	heat	chaperone protein dnaJ 1, mitochondrial isoform X1 cytoplasm;ATP binding;heat shock protein binding;metal ion binding;unfolded protein binding;response to heat;protein refolding;chaperone cofactor-dependent protein refolding
13	DSC06H1	Potri.006G014400	disease	disease resistance RPP13-like protein 4 ADP binding
14	DSC06H2	Potri.006G098300	auxin	auxin transporter-like protein 2 plasma membrane;integral component of membrane;amino acid transmembrane transporter activity;amino acid transmembrane transport
14	DSC06H2	Potri.006G098200	cytokinin	histidine-containing phosphotransfer protein 5-like isoform X1 nucleus;cytoplasm;histidine phosphotransfer kinase activity;2-alkenal reductase [NAD(P)+] activity;protein histidine kinase binding;phosphorelay signal transduction system;protein phosphorylation;cytokinin-activated signaling pathway;oxidation-reduction process
14	DSC06H2	Potri.006G095500	photo	mitochondrial uncoupling protein 1 mitochondrial inner membrane;vacuolar membrane;plasmodesma;integral component of membrane;amino acid transmembrane transporter activity;oxidative phosphorylation uncoupler activity;amino acid transmembrane transport;photorespiration;proton transmembrane transport;mitochondrial transmembrane transport
14	DSC06H2	Potri.006G099402	photo	RNA polymerase II C-terminal domain phosphatase-like 2 photosystem I;photosystem II;chloroplast thylakoid membrane;integral component of membrane;RNA binding;RNA polymerase II CTD heptapeptide repeat phosphatase activity;chlorophyll binding;photosynthesis, light harvesting;protein-chromophore linkage;dephosphorylation of RNA polymerase II C-terminal domain
14	DSC06H2	Potri.006G099500	photo	chlorophyll a-b binding protein CP29.2, chloroplastic photosystem I;photosystem II;chloroplast thylakoid membrane;chloroplast envelope;plastoglobule;integral component of membrane;chlorophyll binding;response to light stimulus;photosynthesis, light harvesting in photosystem I;protein-chromophore linkage
14	DSC06H2	Potri.006G102600	shoot	transcription factor bHLH140 protein dimerization activity;positive regulation of transcription, DNA-templated;regulation of secondary shoot formation
14	DSC06H2	Potri.006G099700	root	protein root UVB sensitive 5 isoform X1
14	DSC06H2	Potri.006G099600	salt	E3 ubiquitin-protein ligase AIRP2 ubiquitin protein ligase activity;response to salt stress;integral component of membrane;cytosol;positive regulation of abscisic acid-activated signaling pathway;protein ubiquitination;ubiquitin-dependent protein catabolic process
14	DSC06H2	Potri.006G105300	salt	probable WRKY transcription factor 33 nucleus;SCF ubiquitin ligase complex;DNA-binding transcription factor activity;ubiquitin-protein transferase activity;sequence-specific DNA binding;transcription regulatory region DNA binding;regulation of transcription, DNA-templated;response to cold;response to water deprivation;systemic acquired resistance;response to salt stress;camalexin biosynthetic pro…
14	DSC06H2	Potri.006G095400	heat	protein SSUH2 homolog heat shock protein binding;unfolded protein binding
14	DSC06H2	Potri.006G105300	heat	probable WRKY transcription factor 33 nucleus;SCF ubiquitin ligase complex;DNA-binding transcription factor activity;ubiquitin-protein transferase activity;sequence-specific DNA binding;transcription regulatory region DNA binding;regulation of transcription, DNA-templated;response to cold;response to water deprivation;systemic acquired resistance;response to salt stress;camalexin biosynthetic pro…
14	DSC06H2	Potri.006G105300	cold	probable WRKY transcription factor 33 nucleus;SCF ubiquitin ligase complex;DNA-binding transcription factor activity;ubiquitin-protein transferase activity;sequence-specific DNA binding;transcription regulatory region DNA binding;regulation of transcription, DNA-templated;response to cold;response to water deprivation;systemic acquired resistance;response to salt stress;camalexin biosynthetic pro…
14	DSC06H2	Potri.006G097901	water	probable aquaporin PIP1-2 vacuole;plasma membrane;plasmodesma;integral component of membrane;water channel activity;water transport;response to water deprivation;transmembrane transport
14	DSC06H2	Potri.006G098100	water	probable aquaporin PIP1-4 vacuole;plasma membrane;plasmodesma;integral component of membrane;water channel activity;water transport;response to water deprivation;transmembrane transport
14	DSC06H2	Potri.006G101500	water	omega-3 fatty acid desaturase, chloroplastic-like integral component of membrane;oxidoreductase activity, acting on paired donors, with oxidation of a pair of donors resulting in the reduction of molecular oxygen to two molecules of water;lipid metabolic process;oxidation-reduction process
14	DSC06H2	Potri.006G105300	water	probable WRKY transcription factor 33 nucleus;SCF ubiquitin ligase complex;DNA-binding transcription factor activity;ubiquitin-protein transferase activity;sequence-specific DNA binding;transcription regulatory region DNA binding;regulation of transcription, DNA-templated;response to cold;response to water deprivation;systemic acquired resistance;response to salt stress;camalexin biosynthetic pro…
15	DSC06H3	Potri.006G154500	brassinosteroid	cytochrome P450 734A1 integral component of membrane;monooxygenase activity;iron ion binding;oxidoreductase activity, acting on paired donors, with incorporation or reduction of molecular oxygen;heme binding;brassinosteroid homeostasis;brassinosteroid metabolic process;oxidation-reduction process
15	DSC06H3	Potri.006G152500	cytokinin	cytokinin dehydrogenase 3 integral component of membrane;cytokinin dehydrogenase activity;FAD binding;cytokinin metabolic process;oxidation-reduction process
15	DSC06H3	Potri.006G157801	photo	hypothetical protein POPTR_008G204500 photosystem II
15	DSC06H3	Potri.006G147500	shoot	glycylpeptide N-tetradecanoyltransferase 1 cytosol;ribosome;glycylpeptide N-tetradecanoyltransferase activity;methyltransferase activity;embryonic shoot morphogenesis;N-terminal peptidyl-glycine N-myristoylation;methylation
15	DSC06H3	Potri.006G147500	embryo	glycylpeptide N-tetradecanoyltransferase 1 cytosol;ribosome;glycylpeptide N-tetradecanoyltransferase activity;methyltransferase activity;embryonic shoot morphogenesis;N-terminal peptidyl-glycine N-myristoylation;methylation
15	DSC06H3	Potri.006G147100	disease	disease resistance protein RPS2 plasma membrane;phosphoprotein phosphatase activity;ADP binding;protein dephosphorylation;plant-type hypersensitive response;detection of bacterium;defense response to bacterium
15	DSC06H3	Potri.006G147350	disease	TIR-NBS-LRR type disease resistance protein nucleus;membrane;organic cyclic compound binding;heterocyclic compound binding;cellular process
15	DSC06H3	Potri.006G154300	salt	Mitogen-activated protein kinase kinase kinase 1 isoform 1 cell;nucleus;DNA-binding transcription activator activity;kinase activity;cellular ion homeostasis;phosphorylation;positive regulation of transcription, DNA-templated;cellular response to salt stress
15	DSC06H3	Potri.006G148200	heat	heat shock factor protein HSF30-like nucleus;RNA polymerase II cis-regulatory region sequence-specific DNA binding;DNA-binding transcription factor activity;positive regulation of transcription from RNA polymerase II promoter in response to heat stress
16	DSC06H4	Potri.006G161400	auxin	auxin-responsive protein IAA27-like nucleus;regulation of transcription, DNA-templated;auxin-activated signaling pathway
16	DSC06H4	Potri.006G166900	auxin	auxin-responsive protein IAA33 nucleus;regulation of transcription, DNA-templated;auxin-activated signaling pathway
16	DSC06H4	Potri.006G165600	photo	nifU-like protein 3, chloroplastic chloroplast stroma;iron ion binding;4 iron, 4 sulfur cluster binding;iron-sulfur cluster assembly;photosystem I assembly;protein maturation by iron-sulfur cluster transfer
16	DSC06H4	Potri.006G167901	photo	ribulose bisphosphate carboxylase small chain clone 512-like plastid;monooxygenase activity;ribulose-bisphosphate carboxylase activity;photorespiration;carbon fixation;photosynthesis;oxidation-reduction process
16	DSC06H4	Potri.006G160100	embryo	Late embryogenesis abundant protein integral component of membrane
17	DSC07H1	Potri.007G076200	gibberellin	transcription factor SRM1 nucleus;response to gibberellin;DNA-binding transcription factor activity;regulation of leaf morphogenesis;positive regulation of transcription, DNA-templated;negative regulation of response to salt stress;transcription regulatory region DNA binding;regulation of abscisic acid-activated signaling pathway;positive regulation of developmental vegetative growth;positive reg…
17	DSC07H1	Potri.007G067800	auxin	auxin-responsive protein SAUR72 response to auxin
17	DSC07H1	Potri.007G068500	auxin	protein PXR1 nucleus;regulation of auxin mediated signaling pathway;style development;stigma development
17	DSC07H1	Potri.007G068600	auxin	pentatricopeptide repeat-containing protein At3g24000, mitochondrial nucleus;zinc ion binding;regulation of auxin mediated signaling pathway;RNA modification;style development;stigma development
17	DSC07H1	Potri.007G066100	cytokinin	cytokinin dehydrogenase 3-like cytokinin dehydrogenase activity;FAD binding;cytokinin metabolic process;oxidation-reduction process
17	DSC07H1	Potri.007G071300	photo	photosystem II stability/assembly factor HCF136, chloroplastic
17	DSC07H1	Potri.007G074056	photo	protein PHYTOCHROME KINASE SUBSTRATE 4 kinase activity;phototropism;phosphorylation
17	DSC07H1	Potri.007G076200	leaf	transcription factor SRM1 nucleus;response to gibberellin;DNA-binding transcription factor activity;regulation of leaf morphogenesis;positive regulation of transcription, DNA-templated;negative regulation of response to salt stress;transcription regulatory region DNA binding;regulation of abscisic acid-activated signaling pathway;positive regulation of developmental vegetative growth;positive reg…
17	DSC07H1	Potri.007G073000	seed	protein TRANSPARENT TESTA 16 nucleus;RNA polymerase II regulatory region sequence-specific DNA binding;DNA-binding transcription factor activity, RNA polymerase II-specific;transcription factor binding;2-alkenal reductase [NAD(P)+] activity;protein dimerization activity;positive regulation of transcription by RNA polymerase II;seed development;oxidation-reduction process
17	DSC07H1	Potri.007G076200	salt	transcription factor SRM1 nucleus;response to gibberellin;DNA-binding transcription factor activity;regulation of leaf morphogenesis;positive regulation of transcription, DNA-templated;negative regulation of response to salt stress;transcription regulatory region DNA binding;regulation of abscisic acid-activated signaling pathway;positive regulation of developmental vegetative growth;positive reg…
17	DSC07H1	Potri.007G076200	water	transcription factor SRM1 nucleus;response to gibberellin;DNA-binding transcription factor activity;regulation of leaf morphogenesis;positive regulation of transcription, DNA-templated;negative regulation of response to salt stress;transcription regulatory region DNA binding;regulation of abscisic acid-activated signaling pathway;positive regulation of developmental vegetative growth;positive reg…
18	DSC07H2	Potri.007G078100	brassinosteroid	protein BRASSINOSTEROID INSENSITIVE 1 regulation of seedling development;protein homodimerization activity;protein dephosphorylation;anther wall tapetum cell differentiation;negative regulation of cell death;brassinosteroid mediated signaling pathway;steroid binding;positive regulation of flower development;plasma membrane;detection of brassinosteroid stimulus;ATP binding;phosphoprotein phosphata…
18	DSC07H2	Potri.007G076200	gibberellin	transcription factor SRM1 nucleus;response to gibberellin;DNA-binding transcription factor activity;regulation of leaf morphogenesis;positive regulation of transcription, DNA-templated;negative regulation of response to salt stress;transcription regulatory region DNA binding;regulation of abscisic acid-activated signaling pathway;positive regulation of developmental vegetative growth;positive reg…
18	DSC07H2	Potri.007G071300	photo	photosystem II stability/assembly factor HCF136, chloroplastic
18	DSC07H2	Potri.007G074056	photo	protein PHYTOCHROME KINASE SUBSTRATE 4 kinase activity;phototropism;phosphorylation
18	DSC07H2	Potri.007G076200	leaf	transcription factor SRM1 nucleus;response to gibberellin;DNA-binding transcription factor activity;regulation of leaf morphogenesis;positive regulation of transcription, DNA-templated;negative regulation of response to salt stress;transcription regulatory region DNA binding;regulation of abscisic acid-activated signaling pathway;positive regulation of developmental vegetative growth;positive reg…
18	DSC07H2	Potri.007G078100	leaf	protein BRASSINOSTEROID INSENSITIVE 1 regulation of seedling development;protein homodimerization activity;protein dephosphorylation;anther wall tapetum cell differentiation;negative regulation of cell death;brassinosteroid mediated signaling pathway;steroid binding;positive regulation of flower development;plasma membrane;detection of brassinosteroid stimulus;ATP binding;phosphoprotein phosphata…
18	DSC07H2	Potri.007G078100	flower	protein BRASSINOSTEROID INSENSITIVE 1 regulation of seedling development;protein homodimerization activity;protein dephosphorylation;anther wall tapetum cell differentiation;negative regulation of cell death;brassinosteroid mediated signaling pathway;steroid binding;positive regulation of flower development;plasma membrane;detection of brassinosteroid stimulus;ATP binding;phosphoprotein phosphata…
18	DSC07H2	Potri.007G073000	seed	protein TRANSPARENT TESTA 16 nucleus;RNA polymerase II regulatory region sequence-specific DNA binding;DNA-binding transcription factor activity, RNA polymerase II-specific;transcription factor binding;2-alkenal reductase [NAD(P)+] activity;protein dimerization activity;positive regulation of transcription by RNA polymerase II;seed development;oxidation-reduction process
18	DSC07H2	Potri.007G078100	seed	protein BRASSINOSTEROID INSENSITIVE 1 regulation of seedling development;protein homodimerization activity;protein dephosphorylation;anther wall tapetum cell differentiation;negative regulation of cell death;brassinosteroid mediated signaling pathway;steroid binding;positive regulation of flower development;plasma membrane;detection of brassinosteroid stimulus;ATP binding;phosphoprotein phosphata…
18	DSC07H2	Potri.007G077300	root	root meristem growth factor 9 growth factor activity;signal transduction
18	DSC07H2	Potri.007G076200	salt	transcription factor SRM1 nucleus;response to gibberellin;DNA-binding transcription factor activity;regulation of leaf morphogenesis;positive regulation of transcription, DNA-templated;negative regulation of response to salt stress;transcription regulatory region DNA binding;regulation of abscisic acid-activated signaling pathway;positive regulation of developmental vegetative growth;positive reg…
18	DSC07H2	Potri.007G076200	water	transcription factor SRM1 nucleus;response to gibberellin;DNA-binding transcription factor activity;regulation of leaf morphogenesis;positive regulation of transcription, DNA-templated;negative regulation of response to salt stress;transcription regulatory region DNA binding;regulation of abscisic acid-activated signaling pathway;positive regulation of developmental vegetative growth;positive reg…
19	DSC07H3	Potri.007G078100	brassinosteroid	protein BRASSINOSTEROID INSENSITIVE 1 regulation of seedling development;protein homodimerization activity;protein dephosphorylation;anther wall tapetum cell differentiation;negative regulation of cell death;brassinosteroid mediated signaling pathway;steroid binding;positive regulation of flower development;plasma membrane;detection of brassinosteroid stimulus;ATP binding;phosphoprotein phosphata…
19	DSC07H3	Potri.007G082300	brassinosteroid	somatic embryogenesis receptor kinase 2 plasma membrane;integral component of membrane;transmembrane receptor protein serine/threonine kinase activity;ATP binding;lipid binding;receptor serine/threonine kinase binding;protein phosphorylation;transmembrane receptor protein serine/threonine kinase signaling pathway;microsporogenesis;brassinosteroid mediated signaling pathway;pollen maturation
19	DSC07H3	Potri.007G076200	gibberellin	transcription factor SRM1 nucleus;response to gibberellin;DNA-binding transcription factor activity;regulation of leaf morphogenesis;positive regulation of transcription, DNA-templated;negative regulation of response to salt stress;transcription regulatory region DNA binding;regulation of abscisic acid-activated signaling pathway;positive regulation of developmental vegetative growth;positive reg…
19	DSC07H3	Potri.007G074056	photo	protein PHYTOCHROME KINASE SUBSTRATE 4 kinase activity;phototropism;phosphorylation
19	DSC07H3	Potri.007G076200	leaf	transcription factor SRM1 nucleus;response to gibberellin;DNA-binding transcription factor activity;regulation of leaf morphogenesis;positive regulation of transcription, DNA-templated;negative regulation of response to salt stress;transcription regulatory region DNA binding;regulation of abscisic acid-activated signaling pathway;positive regulation of developmental vegetative growth;positive reg…
19	DSC07H3	Potri.007G078100	leaf	protein BRASSINOSTEROID INSENSITIVE 1 regulation of seedling development;protein homodimerization activity;protein dephosphorylation;anther wall tapetum cell differentiation;negative regulation of cell death;brassinosteroid mediated signaling pathway;steroid binding;positive regulation of flower development;plasma membrane;detection of brassinosteroid stimulus;ATP binding;phosphoprotein phosphata…
19	DSC07H3	Potri.007G082300	embryo	somatic embryogenesis receptor kinase 2 plasma membrane;integral component of membrane;transmembrane receptor protein serine/threonine kinase activity;ATP binding;lipid binding;receptor serine/threonine kinase binding;protein phosphorylation;transmembrane receptor protein serine/threonine kinase signaling pathway;microsporogenesis;brassinosteroid mediated signaling pathway;pollen maturation
19	DSC07H3	Potri.007G082400	embryo	somatic embryogenesis receptor kinase 2 plasma membrane;integral component of membrane;transmembrane receptor protein serine/threonine kinase activity;signaling receptor binding;ATP binding;protein phosphorylation;transmembrane receptor protein serine/threonine kinase signaling pathway
19	DSC07H3	Potri.007G078100	flower	protein BRASSINOSTEROID INSENSITIVE 1 regulation of seedling development;protein homodimerization activity;protein dephosphorylation;anther wall tapetum cell differentiation;negative regulation of cell death;brassinosteroid mediated signaling pathway;steroid binding;positive regulation of flower development;plasma membrane;detection of brassinosteroid stimulus;ATP binding;phosphoprotein phosphata…
19	DSC07H3	Potri.007G078100	seed	protein BRASSINOSTEROID INSENSITIVE 1 regulation of seedling development;protein homodimerization activity;protein dephosphorylation;anther wall tapetum cell differentiation;negative regulation of cell death;brassinosteroid mediated signaling pathway;steroid binding;positive regulation of flower development;plasma membrane;detection of brassinosteroid stimulus;ATP binding;phosphoprotein phosphata…
19	DSC07H3	Potri.007G077300	root	root meristem growth factor 9 growth factor activity;signal transduction
19	DSC07H3	Potri.007G076200	salt	transcription factor SRM1 nucleus;response to gibberellin;DNA-binding transcription factor activity;regulation of leaf morphogenesis;positive regulation of transcription, DNA-templated;negative regulation of response to salt stress;transcription regulatory region DNA binding;regulation of abscisic acid-activated signaling pathway;positive regulation of developmental vegetative growth;positive reg…
19	DSC07H3	Potri.007G080200	heat	heat shock protein 40
19	DSC07H3	Potri.007G080400	heat	DNA-directed RNA polymerase II subunit 4 P-body;RNA polymerase II, core complex;nucleotide binding;single-stranded DNA binding;single-stranded RNA binding;DNA-directed 5'-3' RNA polymerase activity;translation initiation factor binding;nuclear-transcribed mRNA catabolic process, deadenylation-dependent decay;transcription initiation from RNA polymerase II promoter;mRNA export from nucleus in resp…
19	DSC07H3	Potri.007G082000	heat	protein HEAT INTOLERANT 4-like regulation of cellular response to heat
19	DSC07H3	Potri.007G076200	water	transcription factor SRM1 nucleus;response to gibberellin;DNA-binding transcription factor activity;regulation of leaf morphogenesis;positive regulation of transcription, DNA-templated;negative regulation of response to salt stress;transcription regulatory region DNA binding;regulation of abscisic acid-activated signaling pathway;positive regulation of developmental vegetative growth;positive reg…
20	DSC08H1	Potri.008G181900	photo	photosystem II core complex proteins psbY, chloroplastic-like cell;photosystem II;chloroplast thylakoid;integral component of membrane;manganese ion binding;photosynthesis;cell redox homeostasis
20	DSC08H1	Potri.008G187400	photo	glutamate--glyoxylate aminotransferase 2 L-alanine:2-oxoglutarate aminotransferase activity;alanine-glyoxylate transaminase activity;pyridoxal phosphate binding;glycine:2-oxoglutarate aminotransferase activity;biosynthetic process;photorespiration
20	DSC08H1	Potri.008G190900	photo	protein SHORT HYPOCOTYL IN WHITE LIGHT 1 integral component of membrane;regulation of abscisic acid-activated signaling pathway;negative regulation of photomorphogenesis
20	DSC08H1	Potri.008G187700	disease	disease resistance protein RPM1-like hydrolase activity
20	DSC08H1	Potri.008G181500	water	regulator of G-protein signaling 1 nucleus;plasma membrane;endosome membrane;integral component of membrane;G protein-coupled receptor activity;GTPase activator activity;G protein-coupled receptor signaling pathway;response to water deprivation;response to abscisic acid;response to glucose;jasmonic acid mediated signaling pathway;sugar mediated signaling pathway;regulation of cell population prol…
20	DSC08H1	Potri.008G188150	water	alpha-glucan water dikinase, chloroplastic isoform X1 protein histidine kinase activity;ATP binding;peptidyl-histidine phosphorylation
21	DSC08H2	Potri.008G206000	brassinosteroid	G-protein coupled receptor 1 maintenance of seed dormancy;L-phenylalanine biosynthetic process;tyrosine biosynthetic process;activation of phospholipase C activity;brassinosteroid mediated signaling pathway;blue light signaling pathway;Golgi apparatus;cell surface receptor signaling pathway;vacuolar membrane;seed germination;response to cytokinin;plasma membrane;mitotic cell cycle;negative regula…
21	DSC08H2	Potri.008G202200	cytokinin	adenylate isopentenyltransferase 5, chloroplastic-like mitochondrion;AMP dimethylallyltransferase activity;tRNA dimethylallyltransferase activity;tRNA modification;cytokinin biosynthetic process
21	DSC08H2	Potri.008G206000	cytokinin	G-protein coupled receptor 1 maintenance of seed dormancy;L-phenylalanine biosynthetic process;tyrosine biosynthetic process;activation of phospholipase C activity;brassinosteroid mediated signaling pathway;blue light signaling pathway;Golgi apparatus;cell surface receptor signaling pathway;vacuolar membrane;seed germination;response to cytokinin;plasma membrane;mitotic cell cycle;negative regula…
21	DSC08H2	Potri.008G207100	photo	NADH dehydrogenase subunit 2 (chloroplast) chloroplast thylakoid membrane;integral component of membrane;NADH dehydrogenase (ubiquinone) activity;quinone binding;photosynthesis, light reaction;ATP synthesis coupled electron transport
21	DSC08H2	Potri.008G207200	photo	photosystem II protein D2 (chloroplast) chloroplast;photosystem;thylakoid membrane;electron transfer activity;metal ion binding;photosynthetic electron transport chain
21	DSC08H2	Potri.008G208700	photo	photosystem II CP43 chlorophyll apoprotein (chloroplast) photosystem II;chloroplast thylakoid membrane;integral component of membrane;protein binding;chlorophyll binding;electron transporter, transferring electrons within the cyclic electron transport pathway of photosynthesis activity;metal ion binding;photosynthetic electron transport in photosystem II;protein-chromophore linkage
21	DSC08H2	Potri.008G206000	flower	G-protein coupled receptor 1 maintenance of seed dormancy;L-phenylalanine biosynthetic process;tyrosine biosynthetic process;activation of phospholipase C activity;brassinosteroid mediated signaling pathway;blue light signaling pathway;Golgi apparatus;cell surface receptor signaling pathway;vacuolar membrane;seed germination;response to cytokinin;plasma membrane;mitotic cell cycle;negative regula…
21	DSC08H2	Potri.008G209300	flower	flowering-promoting factor 1-like protein 3 regulation of flower development
21	DSC08H2	Potri.008G206000	seed	G-protein coupled receptor 1 maintenance of seed dormancy;L-phenylalanine biosynthetic process;tyrosine biosynthetic process;activation of phospholipase C activity;brassinosteroid mediated signaling pathway;blue light signaling pathway;Golgi apparatus;cell surface receptor signaling pathway;vacuolar membrane;seed germination;response to cytokinin;plasma membrane;mitotic cell cycle;negative regula…
21	DSC08H2	Potri.008G212200	disease	disease resistance protein RGA2-like hydrolase activity;ADP binding
21	DSC08H2	Potri.008G208100	heat	heat shock factor-binding protein 1 nucleus;cytosol;transcription corepressor activity;cellular heat acclimation;negative regulation of nucleic acid-templated transcription
21	DSC08H2	Potri.008G211200	heat	calmodulin-binding heat-shock protein CaMBP hydrolase activity;lipid catabolic process
22	DSC08H3	Potri.008G206000	brassinosteroid	G-protein coupled receptor 1 maintenance of seed dormancy;L-phenylalanine biosynthetic process;tyrosine biosynthetic process;activation of phospholipase C activity;brassinosteroid mediated signaling pathway;blue light signaling pathway;Golgi apparatus;cell surface receptor signaling pathway;vacuolar membrane;seed germination;response to cytokinin;plasma membrane;mitotic cell cycle;negative regula…
22	DSC08H3	Potri.008G206000	cytokinin	G-protein coupled receptor 1 maintenance of seed dormancy;L-phenylalanine biosynthetic process;tyrosine biosynthetic process;activation of phospholipase C activity;brassinosteroid mediated signaling pathway;blue light signaling pathway;Golgi apparatus;cell surface receptor signaling pathway;vacuolar membrane;seed germination;response to cytokinin;plasma membrane;mitotic cell cycle;negative regula…
22	DSC08H3	Potri.008G207100	photo	NADH dehydrogenase subunit 2 (chloroplast) chloroplast thylakoid membrane;integral component of membrane;NADH dehydrogenase (ubiquinone) activity;quinone binding;photosynthesis, light reaction;ATP synthesis coupled electron transport
22	DSC08H3	Potri.008G207200	photo	photosystem II protein D2 (chloroplast) chloroplast;photosystem;thylakoid membrane;electron transfer activity;metal ion binding;photosynthetic electron transport chain
22	DSC08H3	Potri.008G208700	photo	photosystem II CP43 chlorophyll apoprotein (chloroplast) photosystem II;chloroplast thylakoid membrane;integral component of membrane;protein binding;chlorophyll binding;electron transporter, transferring electrons within the cyclic electron transport pathway of photosynthesis activity;metal ion binding;photosynthetic electron transport in photosystem II;protein-chromophore linkage
22	DSC08H3	Potri.008G206000	flower	G-protein coupled receptor 1 maintenance of seed dormancy;L-phenylalanine biosynthetic process;tyrosine biosynthetic process;activation of phospholipase C activity;brassinosteroid mediated signaling pathway;blue light signaling pathway;Golgi apparatus;cell surface receptor signaling pathway;vacuolar membrane;seed germination;response to cytokinin;plasma membrane;mitotic cell cycle;negative regula…
22	DSC08H3	Potri.008G209300	flower	flowering-promoting factor 1-like protein 3 regulation of flower development
22	DSC08H3	Potri.008G206000	seed	G-protein coupled receptor 1 maintenance of seed dormancy;L-phenylalanine biosynthetic process;tyrosine biosynthetic process;activation of phospholipase C activity;brassinosteroid mediated signaling pathway;blue light signaling pathway;Golgi apparatus;cell surface receptor signaling pathway;vacuolar membrane;seed germination;response to cytokinin;plasma membrane;mitotic cell cycle;negative regula…
22	DSC08H3	Potri.008G212200	disease	disease resistance protein RGA2-like hydrolase activity;ADP binding
22	DSC08H3	Potri.008G208100	heat	heat shock factor-binding protein 1 nucleus;cytosol;transcription corepressor activity;cellular heat acclimation;negative regulation of nucleic acid-templated transcription
22	DSC08H3	Potri.008G211200	heat	calmodulin-binding heat-shock protein CaMBP hydrolase activity;lipid catabolic process
23	DSC08H4	Potri.008G219000	root	probable acyl-CoA dehydrogenase IBR3 oxidoreductase activity, acting on the CH-CH group of donors;flavin adenine dinucleotide binding;root hair elongation;oxidation-reduction process
23	DSC08H4	Potri.008G221400	xylem	kinesin-like protein KIN-13A Golgi stack;kinesin complex;microtubule;plasma membrane;secondary cell wall;microtubule motor activity;ATP binding;microtubule binding;ATPase activity;microtubule-based movement;microtubule depolymerization;plant-type secondary cell wall biogenesis;trichome morphogenesis;metaxylem development;regulation of cell wall organization or biogenesis
24	DSC09H1	Potri.009G146300	cytokinin	histidine-containing phosphotransfer protein 1-like nucleus;cytoplasm;histidine phosphotransfer kinase activity;oxidoreductase activity;protein histidine kinase binding;phosphorelay signal transduction system;protein phosphorylation;cytokinin-activated signaling pathway
24	DSC09H1	Potri.009G146500	photo	serine/threonine-protein kinase D6PKL2 nucleus;cytoplasm;plasma membrane;protein serine/threonine kinase activity;ATP binding;protein phosphorylation;gravitropism;phototropism
24	DSC09H1	Potri.009G145700	embryo	late embryogenesis abundant protein-related / LEA protein-related protein
24	DSC09H1	Potri.009G149400	seed	histone deacetylase HDT1 nucleolus;nucleic acid binding;histone deacetylase activity;DNA mediated transformation;polarity specification of adaxial/abaxial axis;seed dormancy process;histone deacetylation;negative regulation of transcription, DNA-templated;root development
24	DSC09H1	Potri.009G149700	seed	glucomannan 4-beta-mannosyltransferase 2 Golgi apparatus;integral component of membrane;cellulose synthase (UDP-forming) activity;glucomannan 4-beta-mannosyltransferase activity;mannan synthase activity;mucilage biosynthetic process;mucilage metabolic process involved in seed coat development;mannosylation
24	DSC09H1	Potri.009G149400	root	histone deacetylase HDT1 nucleolus;nucleic acid binding;histone deacetylase activity;DNA mediated transformation;polarity specification of adaxial/abaxial axis;seed dormancy process;histone deacetylation;negative regulation of transcription, DNA-templated;root development
24	DSC09H1	Potri.009G147900	salt	18.1 kDa class I heat shock protein-like protein self-association;unfolded protein binding;response to reactive oxygen species;protein folding;response to heat;response to salt stress;protein complex oligomerization
24	DSC09H1	Potri.009G148000	salt	18.1 kDa class I heat shock protein-like protein self-association;unfolded protein binding;response to reactive oxygen species;protein folding;response to heat;response to salt stress;protein complex oligomerization
24	DSC09H1	Potri.009G147900	heat	18.1 kDa class I heat shock protein-like protein self-association;unfolded protein binding;response to reactive oxygen species;protein folding;response to heat;response to salt stress;protein complex oligomerization
24	DSC09H1	Potri.009G148000	heat	18.1 kDa class I heat shock protein-like protein self-association;unfolded protein binding;response to reactive oxygen species;protein folding;response to heat;response to salt stress;protein complex oligomerization
25	DSC10H1	Potri.010G035900	auxin	IAA-amino acid hydrolase ILR1-like 1 endoplasmic reticulum;integral component of membrane;IAA-Ala conjugate hydrolase activity;hippurate hydrolase activity;auxin metabolic process
25	DSC10H1	Potri.010G027100	cytokinin	histidine-containing phosphotransfer protein 1 nucleus;cytoplasm;histidine phosphotransfer kinase activity;2-alkenal reductase [NAD(P)+] activity;protein histidine kinase binding;phosphorelay signal transduction system;protein phosphorylation;cytokinin-activated signaling pathway;oxidation-reduction process
25	DSC10H1	Potri.010G030500	cytokinin	adenylate isopentenyltransferase 5, chloroplastic-like mitochondrion;AMP dimethylallyltransferase activity;tRNA dimethylallyltransferase activity;tRNA modification;cytokinin biosynthetic process
25	DSC10H1	Potri.010G036400	cytokinin	zinc finger protein 5 nucleus;DNA-binding transcription factor activity;transcription regulatory region DNA binding;regulation of transcription, DNA-templated;cytokinin-activated signaling pathway;gibberellic acid mediated signaling pathway;trichome differentiation
25	DSC10H1	Potri.010G032700	photo	photosystem II 44 kDa protein (chloroplast) photosystem II;chloroplast thylakoid membrane;integral component of membrane;chlorophyll binding;electron transporter, transferring electrons within the cyclic electron transport pathway of photosynthesis activity;metal ion binding;photosynthetic electron transport in photosystem II;protein-chromophore linkage
25	DSC10H1	Potri.010G029100	leaf	glutamine synthetase leaf isozyme, chloroplastic mitochondrion;glutamate-ammonia ligase activity;ATP binding;glutamine biosynthetic process
25	DSC10H1	Potri.010G038500	embryo	DExH-box ATP-dependent RNA helicase DExH15 chloroplastic chloroplast stroma;cytoplasmic stress granule;Ski complex;RNA binding;RNA helicase activity;ATP binding;Group II intron splicing;mRNA processing;embryo development ending in seed dormancy;plasmodesmata-mediated intercellular transport;posttranscriptional gene silencing;cytidine to uridine editing;nuclear-transcribed mRNA catabolic process, …
25	DSC10H1	Potri.010G038500	seed	DExH-box ATP-dependent RNA helicase DExH15 chloroplastic chloroplast stroma;cytoplasmic stress granule;Ski complex;RNA binding;RNA helicase activity;ATP binding;Group II intron splicing;mRNA processing;embryo development ending in seed dormancy;plasmodesmata-mediated intercellular transport;posttranscriptional gene silencing;cytidine to uridine editing;nuclear-transcribed mRNA catabolic process, …
25	DSC10H1	Potri.010G033900	heat	heat-inducible transcription repressor
26	DSC10H2	Potri.010G045100	photo	glutamate--glyoxylate aminotransferase 2 L-alanine:2-oxoglutarate aminotransferase activity;alanine-glyoxylate transaminase activity;pyridoxal phosphate binding;glycine:2-oxoglutarate aminotransferase activity;biosynthetic process;photorespiration
26	DSC10H2	Potri.010G047500	photo	chloroplast sensor kinase, chloroplastic chloroplast stroma;phosphorelay sensor kinase activity;protein self-association;quinone binding;phosphorelay signal transduction system;regulation of gene expression;peptidyl-histidine phosphorylation;signal transduction by protein phosphorylation;protein autophosphorylation;detection of redox state;photosystem stoichiometry adjustment
26	DSC10H2	Potri.010G052000	photo	photosystem II core complex proteins psbY, chloroplastic-like cell;photosystem II;chloroplast thylakoid;integral component of membrane;manganese ion binding;photosynthesis;cell redox homeostasis
26	DSC10H2	Potri.010G052600	root	polyamine-modulated factor 1-binding protein 1 trans-Golgi network membrane;vacuolar transport;response to salt stress;circumnutation;root development
26	DSC10H2	Potri.010G044601	disease	disease resistance protein RPM1-like hydrolase activity
26	DSC10H2	Potri.010G053902	disease	TIR-NBS type disease resistance protein
26	DSC10H2	Potri.010G052600	salt	polyamine-modulated factor 1-binding protein 1 trans-Golgi network membrane;vacuolar transport;response to salt stress;circumnutation;root development
26	DSC10H2	Potri.010G053400	heat	small heat shock protein, chloroplastic-like
26	DSC10H2	Potri.010G044100	water	alpha-glucan water dikinase, chloroplastic isoform X1 protein histidine kinase activity;ATP binding;peptidyl-histidine phosphorylation
27	DSC11H1	Potri.011G082800	brassinosteroid	ornithine aminotransferase, mitochondrial mitochondrion;ornithine-oxo-acid transaminase activity;zinc ion binding;pyridoxal phosphate binding;ornithine catabolic process;response to oxidative stress;response to heat;response to flooding;response to water deprivation;response to auxin;response to abscisic acid;response to brassinosteroid;response to jasmonic acid;defense response to bacterium, inc…
27	DSC11H1	Potri.011G082800	auxin	ornithine aminotransferase, mitochondrial mitochondrion;ornithine-oxo-acid transaminase activity;zinc ion binding;pyridoxal phosphate binding;ornithine catabolic process;response to oxidative stress;response to heat;response to flooding;response to water deprivation;response to auxin;response to abscisic acid;response to brassinosteroid;response to jasmonic acid;defense response to bacterium, inc…
27	DSC11H1	Potri.011G091900	auxin	auxin response factor 6-like isoform X1 nucleus;DNA binding;regulation of transcription, DNA-templated;auxin-activated signaling pathway
27	DSC11H1	Potri.011G079500	photo	chlorophyll a-b binding protein of LHCII type 1 photosystem I;photosystem II;chloroplast thylakoid membrane;chloroplast envelope;plastoglobule;integral component of membrane;chlorophyll binding;response to light stimulus;photosynthesis, light harvesting in photosystem I;protein-chromophore linkage
27	DSC11H1	Potri.011G083300	photo	protease Do-like 5, chloroplastic chloroplast thylakoid lumen;serine-type endopeptidase activity;2-alkenal reductase [NAD(P)+] activity;proteolysis;photosystem II repair;oxidation-reduction process
27	DSC11H1	Potri.011G084251	photo	NADH dehydrogenase subunit 2 (chloroplast) chloroplast thylakoid membrane;integral component of membrane;NADH dehydrogenase (ubiquinone) activity;quinone binding;photosynthesis, light reaction;ATP synthesis coupled electron transport
27	DSC11H1	Potri.011G082000	seed	protein HOMOLOG OF MAMMALIAN LYST-INTERACTING PROTEIN 5 nucleus;multivesicular body;protein homodimerization activity;defense response, incompatible interaction;late endosome to vacuole transport via multivesicular body sorting pathway;mucilage extrusion from seed coat;positive regulation of defense response to bacterium;regulation of vacuolar transport
27	DSC11H1	Potri.011G082800	heat	ornithine aminotransferase, mitochondrial mitochondrion;ornithine-oxo-acid transaminase activity;zinc ion binding;pyridoxal phosphate binding;ornithine catabolic process;response to oxidative stress;response to heat;response to flooding;response to water deprivation;response to auxin;response to abscisic acid;response to brassinosteroid;response to jasmonic acid;defense response to bacterium, inc…
27	DSC11H1	Potri.011G082800	water	ornithine aminotransferase, mitochondrial mitochondrion;ornithine-oxo-acid transaminase activity;zinc ion binding;pyridoxal phosphate binding;ornithine catabolic process;response to oxidative stress;response to heat;response to flooding;response to water deprivation;response to auxin;response to abscisic acid;response to brassinosteroid;response to jasmonic acid;defense response to bacterium, inc…
28	DSC11H2	Potri.011G128000	brassinosteroid	receptor-like protein kinase THESEUS 1 plasma membrane;plasmodesma;integral component of membrane;protein kinase activity;ATP binding;response to brassinosteroid;defense response to fungus, incompatible interaction;unidimensional cell growth;protein autophosphorylation
28	DSC11H2	Potri.011G134000	gibberellin	gibberellin 2-beta-dioxygenase 8-like metal ion binding;dioxygenase activity;oxidation-reduction process
28	DSC11H2	Potri.011G134100	gibberellin	gibberellin 2-beta-dioxygenase 8-like metal ion binding;dioxygenase activity;oxidation-reduction process
28	DSC11H2	Potri.011G134600	seed	2S sulfur-rich seed storage protein 2-like
28	DSC11H2	Potri.011G135700	xylem	CTD small phosphatase-like protein 2, putative xylem development
28	DSC11H2	Potri.011G129800	disease	disease resistance RPP13-like protein 4 protein serine/threonine kinase activity;ADP binding;protein phosphorylation
28	DSC11H2	Potri.011G131800	heat	21.7 kDa class VI heat shock protein
29	DSC12H1	Potri.012G047200	auxin	probable auxin efflux carrier component 1c isoform X1 integral component of membrane;auxin-activated signaling pathway;transmembrane transport
29	DSC12H1	Potri.012G053200	disease	disease resistance protein TAO1-like membrane;ADP binding;signal transduction
29	DSC12H1	Potri.012G045000	heat	TPR repeat-containing thioredoxin TDX cell;heat shock protein binding;protein dimerization activity;cell redox homeostasis;chaperone cofactor-dependent protein refolding;protein-containing complex assembly
30	DSC13H1	Potri.013G067500	gibberellin	myb-related protein 306 nucleus;DNA-binding transcription factor activity;sequence-specific DNA binding;transcription regulatory region DNA binding;regulation of transcription, DNA-templated;response to ethylene;response to auxin;response to gibberellin;cell differentiation
30	DSC13H1	Potri.013G067500	auxin	myb-related protein 306 nucleus;DNA-binding transcription factor activity;sequence-specific DNA binding;transcription regulatory region DNA binding;regulation of transcription, DNA-templated;response to ethylene;response to auxin;response to gibberellin;cell differentiation
30	DSC13H1	Potri.013G058601	photo	photosynthetic NDH subunit of subcomplex B 2, chloroplastic chloroplast thylakoid membrane;NAD(P)H dehydrogenase complex (plastoquinone);catalytic activity;carbohydrate binding;carbohydrate metabolic process;photosynthetic electron transport in photosystem I
30	DSC13H1	Potri.013G062100	cold	cold-shock protein CS120 isoform X1 metal ion binding
30	DSC13H1	Potri.013G062200	cold	cold-shock protein CS120 isoform X1 metal ion binding
30	DSC13H1	Potri.013G062301	cold	cold-shock protein CS120 isoform X1 metal ion binding
30	DSC13H1	Potri.013G062401	cold	cold-shock protein CS120 isoform X1 metal ion binding
32	DSC14H1	Potri.014G179100	brassinosteroid	ent-kaurenoic acid oxidase 2-like endoplasmic reticulum;integral component of membrane;iron ion binding;heme binding;ent-kaurenoate oxidase activity;multicellular organism development;brassinosteroid homeostasis;sterol metabolic process;brassinosteroid biosynthetic process;oxidation-reduction process
32	DSC14H1	Potri.014G179300	brassinosteroid	probable serine/threonine-protein kinase At4g35230 protein kinase activity;ATP binding;protein phosphorylation;brassinosteroid mediated signaling pathway
32	DSC14H1	Potri.014G178900	embryo	late embryogenesis abundant protein 6 embryo development ending in seed dormancy
32	DSC14H1	Potri.014G178900	seed	late embryogenesis abundant protein 6 embryo development ending in seed dormancy
33	DSC14H2	Potri.014G193400	salt	ABC transporter C family member 5 plant-type vacuole;cell;vacuolar membrane;integral component of membrane;ATP binding;sulfonylurea receptor activity;ATPase activity;ATPase-coupled transmembrane transporter activity;response to salt stress;cellular potassium ion homeostasis;transmembrane transport;abscisic acid-activated signaling pathway involved in stomatal movement
34	DSC15H1	Potri.015G050500	shoot	transcription factor TCP12 nucleus;DNA-binding transcription factor activity;sequence-specific DNA binding;regulation of transcription, DNA-templated;regulation of secondary shoot formation
34	DSC15H1	Potri.015G051800	water	protein ASPARTIC PROTEASE IN GUARD CELL 1 endoplasmic reticulum;aspartic-type endopeptidase activity;proteolysis;response to water deprivation;systemic acquired resistance;response to abscisic acid;protein catabolic process
35	DSC16H1	Potri.016G092400	auxin	auxin-responsive protein SAUR50-like response to auxin
35	DSC16H1	Potri.016G094033	photo	photosystem I subunit VIII (chloroplast) photosystem I;chloroplast thylakoid membrane;integral component of membrane;photosynthesis
35	DSC16H1	Potri.016G094067	photo	photosystem I assembly protein ycf4 (chloroplast) photosystem I;chloroplast thylakoid membrane;integral component of membrane;photosynthesis
35	DSC16H1	Potri.016G094201	photo	cytochrome f (chloroplast) chloroplast thylakoid membrane;integral component of thylakoid membrane;iron ion binding;electron transfer activity;heme binding;photosynthesis;electron transport chain
35	DSC16H1	Potri.016G103100	photo	protein RETICULATA, chloroplastic mitochondrion;chloroplast inner membrane;integral component of membrane;response to reactive oxygen species;photoperiodism;chloroplast organization;leaf development
35	DSC16H1	Potri.016G103100	leaf	protein RETICULATA, chloroplastic mitochondrion;chloroplast inner membrane;integral component of membrane;response to reactive oxygen species;photoperiodism;chloroplast organization;leaf development
35	DSC16H1	Potri.016G096400	embryo	pentatricopeptide repeat-containing protein At5g03800 intracellular membrane-bounded organelle;zinc ion binding;RNA modification;embryo development ending in seed dormancy
35	DSC16H1	Potri.016G096400	seed	pentatricopeptide repeat-containing protein At5g03800 intracellular membrane-bounded organelle;zinc ion binding;RNA modification;embryo development ending in seed dormancy
35	DSC16H1	Potri.016G092600	disease	disease resistance RPP13-like protein 4 ADP binding
35	DSC16H1	Potri.016G098200	water	aquaporin TIP1-1 integral component of membrane;water channel activity;water transport;transmembrane transport
36	DSC17H1	Potri.017G061600	auxin	protein AUXIN SIGNALING F-BOX 2-like inositol hexakisphosphate binding;auxin-activated signaling pathway
36	DSC17H1	Potri.017G064901	photo	heterogeneous nuclear ribonucleoprotein 1 nucleoplasm;cytosol;ribonucleoprotein complex;mRNA 3'-UTR binding;pre-mRNA intronic binding;mRNA polyadenylation;positive regulation of short-day photoperiodism, flowering;positive regulation of long-day photoperiodism, flowering;regulation of RNA metabolic process
36	DSC17H1	Potri.017G064901	flower	heterogeneous nuclear ribonucleoprotein 1 nucleoplasm;cytosol;ribonucleoprotein complex;mRNA 3'-UTR binding;pre-mRNA intronic binding;mRNA polyadenylation;positive regulation of short-day photoperiodism, flowering;positive regulation of long-day photoperiodism, flowering;regulation of RNA metabolic process
36	DSC17H1	Potri.017G067600	salt	transcription termination factor MTERF5, chloroplastic isoform X1 double-stranded DNA binding;regulation of transcription, DNA-templated;response to salt stress;chloroplast organization;response to abscisic acid;developmental process
36	DSC17H1	Potri.017G059600	heat	heat stress transcription factor A-5 nucleus;RNA polymerase II cis-regulatory region sequence-specific DNA binding;DNA-binding transcription factor activity;positive regulation of transcription from RNA polymerase II promoter in response to heat stress
37	DSC17H2	Potri.017G099000	brassinosteroid	cytochrome P450 85A monooxygenase activity;iron ion binding;oxidoreductase activity, acting on paired donors, with incorporation or reduction of molecular oxygen;heme binding;multicellular organism development;brassinosteroid homeostasis;sterol metabolic process;brassinosteroid biosynthetic process;oxidation-reduction process
37	DSC17H2	Potri.017G101100	auxin	auxin transport protein BIG cytosol;plasmodesma;zinc ion binding;response to fungus;photomorphogenesis;response to auxin;unidimensional cell growth;auxin polar transport;lateral root formation;inflorescence morphogenesis
37	DSC17H2	Potri.017G101100	photo	auxin transport protein BIG cytosol;plasmodesma;zinc ion binding;response to fungus;photomorphogenesis;response to auxin;unidimensional cell growth;auxin polar transport;lateral root formation;inflorescence morphogenesis
37	DSC17H2	Potri.017G092600	embryo	sister chromatid cohesion protein SCC2 isoform X1 mitotic chromosome condensation;embryo development ending in seed dormancy;Scc2-Scc4 cohesin loading complex;positive regulation of mitotic cohesin loading;chromatin binding;centromere complex assembly;nuclear chromatin;metal ion binding;meiotic sister chromatid cohesion;replication-born double-strand break repair via sister chromatid exchange;rDN…
37	DSC17H2	Potri.017G092600	seed	sister chromatid cohesion protein SCC2 isoform X1 mitotic chromosome condensation;embryo development ending in seed dormancy;Scc2-Scc4 cohesin loading complex;positive regulation of mitotic cohesin loading;chromatin binding;centromere complex assembly;nuclear chromatin;metal ion binding;meiotic sister chromatid cohesion;replication-born double-strand break repair via sister chromatid exchange;rDN…
37	DSC17H2	Potri.017G101100	root	auxin transport protein BIG cytosol;plasmodesma;zinc ion binding;response to fungus;photomorphogenesis;response to auxin;unidimensional cell growth;auxin polar transport;lateral root formation;inflorescence morphogenesis
37	DSC17H2	Potri.017G098700	salt	protein COBRA plant-type cell wall;longitudinal side of cell surface;integral component of membrane;anchored component of plasma membrane;response to salt stress;multidimensional cell growth;cellulose microfibril organization;plant-type cell wall cellulose biosynthetic process
37	DSC17H2	Potri.017G090600	heat	chaperone protein ClpB3, chloroplastic-like cytoplasm;ATP binding;response to heat;protein metabolic process;protein refolding
38	DSC19H1	Potri.019G045900	gibberellin	myb-related protein 306 nucleus;DNA-binding transcription factor activity;sequence-specific DNA binding;transcription regulatory region DNA binding;regulation of transcription, DNA-templated;response to ethylene;response to auxin;response to gibberellin;cell differentiation
38	DSC19H1	Potri.019G045900	auxin	myb-related protein 306 nucleus;DNA-binding transcription factor activity;sequence-specific DNA binding;transcription regulatory region DNA binding;regulation of transcription, DNA-templated;response to ethylene;response to auxin;response to gibberellin;cell differentiation
38	DSC19H1	Potri.019G047480	photo	photosystem II 44 kDa protein (chloroplast) photosystem II;chloroplast thylakoid membrane;integral component of membrane;chlorophyll binding;electron transporter, transferring electrons within the cyclic electron transport pathway of photosynthesis activity;metal ion binding;photosynthetic electron transport in photosystem II;protein-chromophore linkage
38	DSC19H1	Potri.019G047540	photo	photosystem II protein D2 (chloroplast) chloroplast;integral component of membrane;ATP binding;electron transporter, transferring electrons within the cyclic electron transport pathway of photosynthesis activity;photosynthetic electron transport in photosystem II
38	DSC19H1	Potri.019G047300	embryo	transducin beta-like protein 3 small-subunit processome;Pwp2p-containing subcomplex of 90S preribosome;myosin heavy chain kinase activity;snoRNA binding;maturation of SSU-rRNA from tricistronic rRNA transcript (SSU-rRNA, 5.8S rRNA, LSU-rRNA);protein phosphorylation;embryo development ending in seed dormancy;embryonic pattern specification;cell division
38	DSC19H1	Potri.019G047300	seed	transducin beta-like protein 3 small-subunit processome;Pwp2p-containing subcomplex of 90S preribosome;myosin heavy chain kinase activity;snoRNA binding;maturation of SSU-rRNA from tricistronic rRNA transcript (SSU-rRNA, 5.8S rRNA, LSU-rRNA);protein phosphorylation;embryo development ending in seed dormancy;embryonic pattern specification;cell division
38	DSC19H1	Potri.019G036850	disease	putative disease resistance protein RGA3 ADP binding
38	DSC19H1	Potri.019G036900	disease	disease resistance RPP13-like protein 4
38	DSC19H1	Potri.019G046000	disease	TIR-NBS disease resistance-like protein ADP binding;signal transduction
38	DSC19H1	Potri.019G039500	salt	BTB/POZ and MATH domain-containing protein 4 isoform X1 cytosol;integral component of membrane;cellular response to water deprivation;cellular response to salt stress
38	DSC19H1	Potri.019G042201	cold	GPCR-type G protein 2 isoform X2 endoplasmic reticulum membrane;plasma membrane;integral component of membrane;abscisic acid binding;metal ion binding;GTPase binding;response to abscisic acid;cellular response to cold
38	DSC19H1	Potri.019G039500	water	BTB/POZ and MATH domain-containing protein 4 isoform X1 cytosol;integral component of membrane;cellular response to water deprivation;cellular response to salt stress
39	DSC19H2	Potri.019G092800	photo	transcription factor VOZ1-like nucleus;response to salt stress;positive regulation of transcription, DNA-templated;cytoplasm;sequence-specific DNA binding;positive regulation of long-day photoperiodism, flowering
39	DSC19H2	Potri.019G091300	shoot	transcription factor TCP4-like nucleus;DNA-binding transcription factor activity;sequence-specific DNA binding;regulation of transcription, DNA-templated;regulation of secondary shoot formation
39	DSC19H2	Potri.019G092800	flower	transcription factor VOZ1-like nucleus;response to salt stress;positive regulation of transcription, DNA-templated;cytoplasm;sequence-specific DNA binding;positive regulation of long-day photoperiodism, flowering
39	DSC19H2	Potri.019G090300	seed	seed biotin-containing protein SBP65 isoform X1
39	DSC19H2	Potri.019G095866	disease	disease resistance-like protein DSC1 ADP binding;signal transduction
39	DSC19H2	Potri.019G095932	disease	putative disease resistance protein At4g11170 isoform X1 ADP binding;signal transduction
39	DSC19H2	Potri.019G097100	disease	disease resistance-like protein DSC1 ADP binding;signal transduction
39	DSC19H2	Potri.019G097640	disease	disease resistance protein TAO1 ADP binding;signal transduction
39	DSC19H2	Potri.019G097720	disease	disease resistance-like protein DSC1 isoform X1 ADP binding;signal transduction
39	DSC19H2	Potri.019G097800	disease	disease resistance-like protein DSC1 isoform X1 ADP binding;signal transduction
39	DSC19H2	Potri.019G098500	disease	disease resistance-like protein DSC1 ADP binding;signal transduction
39	DSC19H2	Potri.019G098550	disease	disease resistance protein RPS6-like isoform X5 ADP binding;signal transduction
39	DSC19H2	Potri.019G098700	disease	disease resistance-like protein DSC1 isoform X1 ADP binding;signal transduction
39	DSC19H2	Potri.019G098900	disease	disease resistance-like protein DSC1 isoform X1 ADP binding;signal transduction
39	DSC19H2	Potri.019G092800	salt	transcription factor VOZ1-like nucleus;response to salt stress;positive regulation of transcription, DNA-templated;cytoplasm;sequence-specific DNA binding;positive regulation of long-day photoperiodism, flowering
40	DSC19H3	Potri.019G092800	photo	transcription factor VOZ1-like nucleus;response to salt stress;positive regulation of transcription, DNA-templated;cytoplasm;sequence-specific DNA binding;positive regulation of long-day photoperiodism, flowering
40	DSC19H3	Potri.019G092800	flower	transcription factor VOZ1-like nucleus;response to salt stress;positive regulation of transcription, DNA-templated;cytoplasm;sequence-specific DNA binding;positive regulation of long-day photoperiodism, flowering
40	DSC19H3	Potri.019G095866	disease	disease resistance-like protein DSC1 ADP binding;signal transduction
40	DSC19H3	Potri.019G095932	disease	putative disease resistance protein At4g11170 isoform X1 ADP binding;signal transduction
40	DSC19H3	Potri.019G097100	disease	disease resistance-like protein DSC1 ADP binding;signal transduction
40	DSC19H3	Potri.019G097640	disease	disease resistance protein TAO1 ADP binding;signal transduction
40	DSC19H3	Potri.019G097720	disease	disease resistance-like protein DSC1 isoform X1 ADP binding;signal transduction
40	DSC19H3	Potri.019G097800	disease	disease resistance-like protein DSC1 isoform X1 ADP binding;signal transduction
40	DSC19H3	Potri.019G098500	disease	disease resistance-like protein DSC1 ADP binding;signal transduction
40	DSC19H3	Potri.019G098550	disease	disease resistance protein RPS6-like isoform X5 ADP binding;signal transduction
40	DSC19H3	Potri.019G098700	disease	disease resistance-like protein DSC1 isoform X1 ADP binding;signal transduction
40	DSC19H3	Potri.019G098900	disease	disease resistance-like protein DSC1 isoform X1 ADP binding;signal transduction
40	DSC19H3	Potri.019G092800	salt	transcription factor VOZ1-like nucleus;response to salt stress;positive regulation of transcription, DNA-templated;cytoplasm;sequence-specific DNA binding;positive regulation of long-day photoperiodism, flowering
41	DST45H1	Potri.T003068	disease	TIR-NBS disease resistance-like protein integral component of membrane;ADP binding;signal transduction
